# Supplementary material for: Methylation of DROSHA and DICER as a Biomarker for the Detection of Lung Cancer
Source: MDPI journal article supplement (doi:10.3390/cancers13236139), 2021-12-06
Supplement: s1 [file s1]

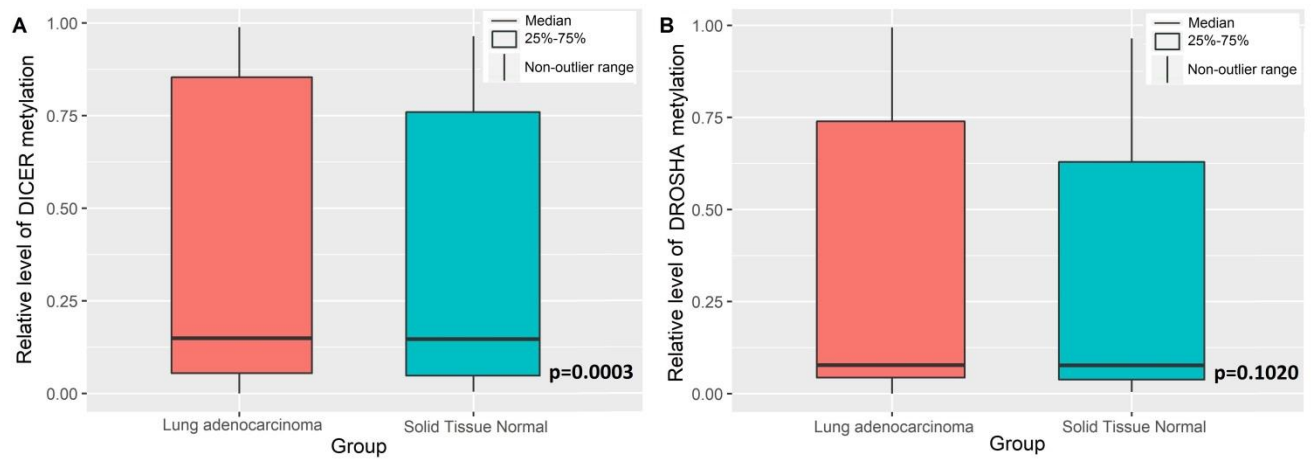

**Figure S1.** The relative methylation level of *DICER* (A) and *DROSHA* (B) genes in samples from patients with lung adenocarcinoma compared with normal solid tissue (*in silico* analysis of the TCGA data).

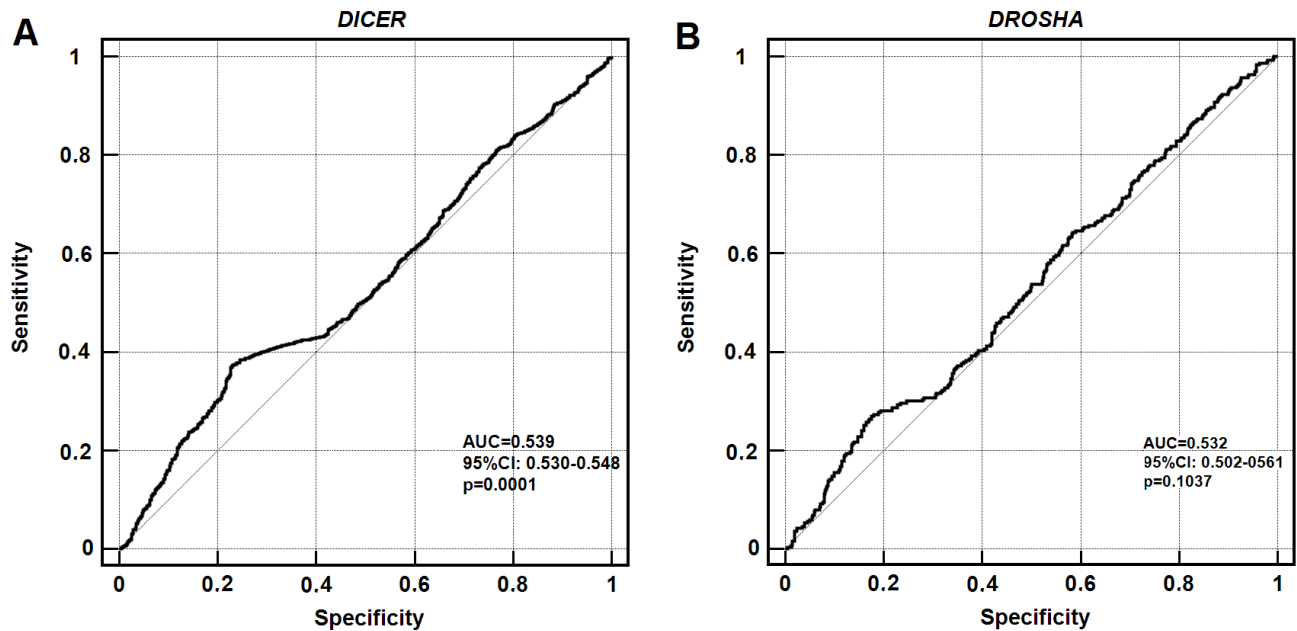

**Figure S2.** ROC curves analysis to distinguish between normal solid tissue and samples from patients with lung adenocarcinoma on the basis of the relative methylation level of *DICER* (A) and *DROSHA* (B) genes.
